# Supplementary material for: Elevated kindlin-2 promotes tumour progression and angiogenesis through the mTOR/VEGFA pathway in melanoma
Source: PubMed Central journal article supplement (PMC6738412; doi:10.18632/aging.102187), 2019-08-19
Supplement: aging-11-102187-s001.pdf [file aging-11-102187-s001.pdf]

## SUPPLEMENTARY TABLES

**Supplementary Table 1. Sequences of Primers used for Real-time Polymerase Chain Reaction.**

|                                   |                               |
|-----------------------------------|-------------------------------|
| <b>kindlin-2</b>                  |                               |
| Forward                           | 5'-CAGACACCCCGAAGAACTTTC-3'   |
| Reverse                           | 5'-GCCCCTCTAATTCAAGTGCCT-3'   |
| <b>N-cadherin</b>                 |                               |
| Forward                           | 5'-AGCCAACCTTAACTGAGGAGT-3'   |
| Reverse                           | 5'-GGCAAGTTGATTGGAGGGATG-3'   |
| <b><math>\beta</math>-catenin</b> |                               |
| Forward                           | 5'-AGCTTCCAGACACGCTATCAT-3'   |
| Reverse                           | 5'-CGGTACAACGAGCTGTTTCTAC-3'  |
| <b>ZEB1</b>                       |                               |
| Forward                           | 5'-TTACACCTTTGCATACAGAACCC-3' |
| Reverse                           | 5'-TTTACGATTACACCCAGACTGC-3'  |
| <b>ZEB2</b>                       |                               |
| Forward                           | 5'-GCGATGGTCATGCAGTCAG-3'     |
| Reverse                           | 5'-CAGGTGGCAGGTCATTTTCTT-3'   |
| <b>GAPDH</b>                      |                               |
| Forward                           | 5'-GGTATGACAACGAATTTGGC-3'    |
| Reverse                           | 5'-GAGCACAGGGTACTTTATTG-3'    |

**Supplementary Table 2. List of Primary Antibodies Used in the Study.**

| Antibody         | Applications            | Company          |
|------------------|-------------------------|------------------|
| kindlin-2        | WB, IF, IP              | Abcam (ab74030)  |
| GAPDH            | WB, IF, IHC,            | Abcam (ab8245)   |
| N-cadherin       | WB, IF, IHC, IP         | CST (13116)      |
| $\beta$ -catenin | WB, F, IF, IHC, IP, IHC | CST (8480)       |
| ZEB1             | WB, F, IF, IHC          | Abcam (ab203829) |
| ZEB2             | WB, IHC                 | Abcam (ab138222) |
| p-Smad2/3        | WB, IHC                 | Abcam (ab38449)  |
| Smad2/3          | WB, IHC, ELISA,         | Abcam (ab8805)   |
| CD31             | WB, IHC, IF, F          | Abcam (ab32457)  |
| p-mTOR           | WB, IF, ELISA           | CST (5536)       |
| mTOR             | WB, IHC, IF, F          | CST (2983)       |
| VEGFA            | WB, ELISA               | Abcam (ab46154)  |

**Abbreviations:** WB: western blot; IHC: immunohistochemistry; IF: immunofluorescence; IP: immunoprecipitation; ELISA: enzyme-linked immunosorbent assay; F: flow cytometric analysis.
